# Supplementary material for: Chemokine receptor CXCR4 regulates CaMKII/CREB pathway in spinal neurons that underlies cancer-induced bone pain
Source: PubMed Central journal article supplement (PMC5479786; doi:10.1038/s41598-017-04198-3), 2017-06-21
Supplement: 41598_2017_4198_MOESM1_ESM.pdf [file 41598_2017_4198_MOESM1_ESM.pdf]

## Supplementary Figure

### **Chemokine receptor CXCR4 regulates CaMKII/CREB pathway in spinal neurons that underlies cancer-induced bone pain**

Xue-Ming Hu<sup>1,2,\*</sup>, Hui Zhang<sup>2,\*</sup>, Heng Xu<sup>1,2,\*</sup>, Hai-Long Zhang<sup>2</sup>, Li-Ping Chen<sup>1,2</sup>, Wen-Qiang Cui<sup>3</sup>, Wei Yang<sup>3</sup> & Wen Shen<sup>1,2,†</sup>

*<sup>1</sup>Department of Pain Medicine, Affiliated Hospital of Xuzhou Medical University, Xuzhou, Jiangsu 221002, China.*

*<sup>2</sup>Jiangsu Province Key Laboratory of Anesthesiology and Jiangsu Province Key Laboratory of Anesthesia and Analgesia Application Technology, Xuzhou Medical University, Xuzhou, Jiangsu 221002, China.*

*<sup>3</sup>Department of Integrative Medicine and Neurobiology, Academy of Integrative Medicine, School of Basic Medical Sciences, Fudan University, Shanghai 200032, China.*

*\*These authors contributed equally to this work.*

*†Correspondence and requests for materials should be addressed to W. Shen (email: shenwen19962@163.com).*

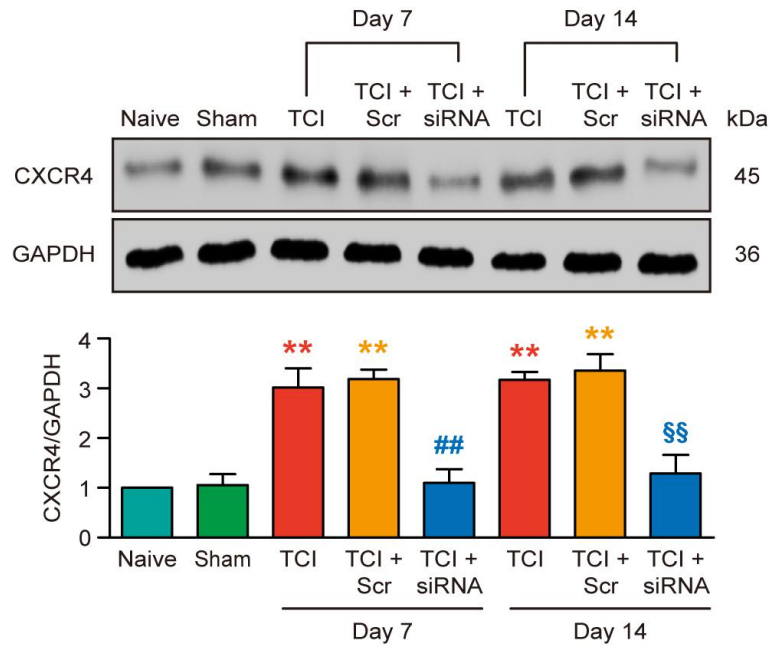

**Supplementary Figure 1: Knockdown effect of siRNA on CXCR4 protein expression on day 7 or day 14 in TCI rats.** CXCR4 siRNA (siRNA, 5 µg/10 µl, i.t.) or scrambled siRNA (Scr, 5 µg/10 µl, i.t.) was administered once daily on days 5, 6 and 7 or days 12, 13 and 14 after TCI. L4-L6 spinal tissues were collected 12 hours after the last injection on day 7 or day 14, respectively. \*\* $P < 0.01$  vs naive group; ## $P < 0.01$  vs TCI Day 7 group; §§ $P < 0.01$  vs TCI Day 14 group;  $n = 4$  for each group.
